# Supplementary material for: Investigating the Mechanism of Low-Salinity Environmental Adaptation in Sepia esculenta Larvae through Transcriptome Profiling
Source: MDPI journal article supplement (doi:10.3390/ani13193139), 2023-10-08
Supplement: s1 [file s1]

**Table S2.** Primers used for qRT-PCR.

| Gene name | Forward primer (5'-3') | TM<br>(°C) | Reverse primer (5'-3') | TM<br>(°C) | Amplicon length<br>(bp) |
|-----------|------------------------|------------|------------------------|------------|-------------------------|
| APOB      | TACTGACTGCTCTGCTACTT   | 60         | GCCACCGCTTCGTATTT      | 60         | 121                     |
| ATR       | GGAAGGTCAAGGCTCTAAAC   | 60         | CATGTACACACAGAGGAAGAC  | 60         | 105                     |
| CDC42     | CTCAGTTATACGACCAGAGGA  | 60         | GCCGTGTCAACGAGATTTA    | 60         | 116                     |
| CHRNA7    | CCATCATCACCACCATCATC   | 60         | TCTCCTCCTCCGACTATCT    | 60         | 108                     |
| CYP3A11   | ACAGACCTCCTCTACCATATC  | 60         | TTTCTCGCGCTGTAAGATG    | 60         | 118                     |
| CYP7A1    | CTCACTTTCGGTACCCTTTG   | 60         | CGTGACCGTGGTAGTTAATG   | 60         | 142                     |
| DUSP1     | GTCTTTCTCGGTGACCATTG   | 60         | GGAAGAGAGATCGGCATACT   | 61         | 165                     |
| GCLC      | CCCAGGGAAACCATTTAGTAG  | 60         | AGAGTCACAAGTGCTTCATC   | 60         | 117                     |
| GRIA1     | GATTGTGGAGTTCGTCTGT    | 59         | TCATTTCCAGTCGGTGTATC   | 59         | 105                     |
| JUN       | CCGAGTTGGAAGGATGATT    | 60         | CACAAATCCTCGGGCATAG    | 60         | 122                     |
| NFKBIA    | CTGCCCTCCAGAAACATTAC   | 60         | CCCATGTTCAGCAGCATAA    | 60         | 116                     |
| NOS1      | CCCACTGAATGTTGCTCTT    | 61         | GCAGTCAGCACAGAGTAGA    | 61         | 103                     |
| NOS2      | GACAGAAGTGGTGGACATTC   | 60         | GCGACAGTACCTGATCTTTG   | 60         | 140                     |
| PARP1     | AGGCAGTGGTGGAATAGA     | 60         | CACGACATGTACTCCGATTG   | 60         | 113                     |
| PHGDH     | TGGCTCTAAGCAGGAACA     | 60         | CGTCCCAAACCAAGAATACC   | 61         | 121                     |
| PRODH2    | CAGATGCACAGGGAGTAAAG   | 60         | CTTGTGTCTTCGTAGGTGTC   | 60         | 124                     |
