# Supplementary material for: Investigating the Mechanism of Low-Salinity Environmental Adaptation in Sepia esculenta Larvae through Transcriptome Profiling
Source: MDPI journal article supplement (doi:10.3390/ani13193139), 2023-10-08
Supplement: s1 [file s1]

**Table S3.** RNA-Seq sequencing results and quality analysis.

| <b>sample</b> | <b>Raw<br/>reads</b> | <b>Raw<br/>bases</b> | <b>Clean<br/>reads</b> | <b>Clean<br/>bases</b> | <b>Q20<br/>(%)</b> | <b>Q30<br/>(%)</b> | <b>Total<br/>mapping</b> |
|---------------|----------------------|----------------------|------------------------|------------------------|--------------------|--------------------|--------------------------|
| C_0h_1        | 46113806             | 6.92G                | 44982104               | 6.75G                  | 97.07              | 92.32              | 39456868                 |
| C_0h_2        | 50545156             | 7.58G                | 49387700               | 7.41G                  | 97.44              | 93.02              | 44052010                 |
| C_0h_3        | 47515546             | 7.13G                | 46359916               | 6.95G                  | 97.27              | 92.68              | 41025164                 |
| C_4h_1        | 46179990             | 6.93G                | 45124190               | 6.77G                  | 96.77              | 91.61              | 39813899                 |
| C_4h_2        | 46409128             | 6.96G                | 44910160               | 6.74G                  | 97.27              | 92.62              | 40048934                 |
| C_4h_3        | 44321476             | 6.65G                | 43052624               | 6.46G                  | 96.27              | 90.81              | 37441672                 |
| C_24h_1       | 44786892             | 6.72G                | 43110154               | 6.47G                  | 95.85              | 90.05              | 37201612                 |
| C_24h_2       | 44943188             | 6.74G                | 43393564               | 6.51G                  | 95.83              | 90.02              | 37413049                 |
| C_24h_3       | 45795096             | 6.87G                | 44886564               | 6.73G                  | 97.42              | 92.92              | 39924459                 |
| SAL20_4h_1    | 46061926             | 6.91G                | 44890260               | 6.73G                  | 97.06              | 92.29              | 39336186                 |
| SAL20_4h_2    | 45914726             | 6.89G                | 44580756               | 6.69G                  | 97.22              | 92.65              | 39383060                 |
| SAL20_4h_3    | 50122024             | 7.52G                | 48685320               | 7.30G                  | 95.69              | 89.74              | 42000224                 |
| SAL20_24h_1   | 42676610             | 6.40G                | 41583698               | 6.24G                  | 97.26              | 92.68              | 36631715                 |
| SAL20_24h_2   | 47687056             | 7.15G                | 46363026               | 6.95G                  | 97.36              | 92.84              | 40997032                 |
| SAL20_24h_3   | 46441770             | 6.97G                | 45115378               | 6.77G                  | 97.41              | 92.91              | 39895803                 |
