# Supplementary material for: Investigating the Mechanism of Low-Salinity Environmental Adaptation in Sepia esculenta Larvae through Transcriptome Profiling
Source: MDPI journal article supplement (doi:10.3390/ani13193139), 2023-10-08
Supplement: s1 [file s1]

**Table S1.** Experimental seawater parameter.

| seawater parameter       | concrete data |
|--------------------------|---------------|
| ocean temperature        | 21.5 ± 1 °C   |
| Control salinity         | 30 ± 0.3 ppt  |
| Treatment group salinity | 20 ± 0.3 ppt  |
| pH                       | 8.2           |
| Dissolved Oxygen         | 5.5mg/L       |
